# Supplementary material for: Sequestration of latent TGF-β binding protein 1 into CADASIL-related Notch3-ECD deposits
Source: PubMed Central journal article supplement (PMC4243959; doi:10.1186/s40478-014-0096-8), 2014-08-13

## Additional file 1 – Figure S1

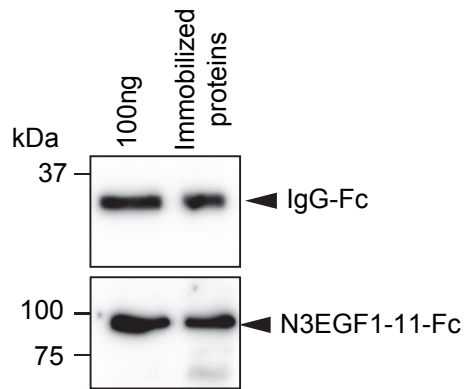

Supplement: 40478_2014_96_MOESM1_ESM.pdf [file 40478_2014_96_MOESM1_ESM.pdf]
